# Supplementary material for: A series of MOFs based on a triangular tri(4-pyridylphenyl)amine ligand combined with carboxylate or nitrate auxiliary ligands
Source: Royal Society of Chemistry journal article supplement (doi:10.1039/c4dt02811b), 2014-11-06
Supplement: c4dt02811b1.pdf [file c4dt02811b1.pdf]

**A series of MOFs based on a triangle ligand tri(4-pyridylphenyl)amine combined with carboxylate or nitrate auxiliary ligand**

Fandian Meng, Mingdao Zhang, Kang Shen, Yizhi Li and Hegen Zheng\*

*State Key Laboratory of Coordination Chemistry, School of Chemistry and Chemical Engineering, Nanjing National Laboratory of Microstructures, Nanjing University, Nanjing 210093, P. R. China*

**Table S1.** Selected Bond Lengths (Å) and Angles (deg) for Compounds **1**.

| Compound 1        |            |                   |            |
|-------------------|------------|-------------------|------------|
| Co(1)-O(5)        | 1.961(5)   | Co(1)-O(1)        | 2.044(2)   |
| Co(1)-N(3)        | 2.151(2)   | Co(1)-N(1)        | 2.159(4)   |
| Co(2)-O(4)        | 1.976(2)   | Co(2)-N(2)        | 2.193(2)   |
| Co(2)-N(4)        | 2.238(4)   | O(5)-Co(1)-O(1)   | 87.39(6)   |
| O(1)-Co(1)-O(1)   | 174.78(12) | O(5)-Co(1)-N(3)   | 90.53(7)   |
| O(1)-Co(1)-N(3)   | 90.51(10)  | N(3)-Co(1)-N(3)   | 178.93(14) |
| O(5)-Co(1)-N(1)   | 180.0      | O(1)-Co(1)-N(1)   | 92.61(6)   |
| N(3)-Co(1)-N(1)   | 89.47(7)   | O(4)-Co(2)-O(4)   | 72.42(16)  |
| O(4)-Co(2)-N(2)#1 | 87.91(10)  | O(4)-Co(2)-N(2)#2 | 91.56(9)   |
| N(2)-Co(2)-N(2)   | 179.34(13) | O(4)-Co(2)-N(4)   | 143.79(8)  |
| N(2)-Co(2)-N(4)   | 90.33(7)   |                   |            |

**Table S2.** Selected Bond Lengths (Å) and Angles (deg) for Compounds **2**.

| Compound <b>2</b> |            |                 |            |
|-------------------|------------|-----------------|------------|
| Zn(1)-N(2)        | 2.020(4)   | Zn(1)-O(2)      | 1.972(3)   |
| Zn(1)-O(1)        | 1.965(3)   | Zn(1)-N(3)      | 2.041(4)   |
| O(1)-Zn(1)-O(2)   | 99.96(14)  | O(1)-Zn(1)-N(2) | 110.81(14) |
| O(2)-Zn(1)-N(2)   | 104.81(15) | O(1)-Zn(1)-N(3) | 106.83(15) |
| O(2)-Zn(1)-N(3)   | 115.11(15) | N(2)-Zn(1)-N(3) | 117.90(15) |

**Table S3.** Selected Bond Lengths (Å) and Angles (deg) for Compounds **3**.

| Compound <b>3</b> |            |                   |            |
|-------------------|------------|-------------------|------------|
| Zn(1)-N(2)        | 2.071(3)   | Zn(2)-N(3)        | 2.067(3)   |
| Zn(1)-O(1)        | 1.988(2)   | Zn(3)-O(4)        | 2.039(2)   |
| Zn(2)-O(5)        | 2.006(3)   | Zn(2)-O(7)        | 2.025(2)   |
| Zn(1)-O(9)        | 1.959(2)   | Zn(3)-O(12)       | 1.993(2)   |
| Zn(2)-O(13)       | 1.992(2)   | Zn(1)-O(1W)       | 2.063(3)   |
| Zn(3)-O(2W)       | 2.028(3)   | Zn(3)-O(3W)       | 1.981(2)   |
| O(1W)-Zn(1)-N(2)  | 104.40(10) | O(13)-Zn(2)-O(5)  | 106.23(11) |
| O(13)-Zn(2)-O(7)  | 104.92(9)  | O(5)-Zn(2)-O(7)   | 113.63(10) |
| O(13)-Zn(2)-N(3)  | 117.62(12) | O(5)-Zn(2)-N(3)   | 114.89(11) |
| O(7)-Zn(2)-N(3)   | 99.22(10)  | O(3W)-Zn(3)-O(12) | 104.35(10) |
| O(3W)-Zn(3)-O(2W) | 97.07(10)  | O(12)-Zn(3)-O(2W) | 104.47(12) |
| O(3W)-Zn(3)-O(4)  | 98.05(10)  | O(12)-Zn(3)-O(4)  | 136.39(10) |
| O(2W)-Zn(3)-O(4)  | 108.92(10) | O(9)-Zn(1)-O(1)   | 134.31(9)  |
| O(9)-Zn(1)-O(1W)  | 99.14(10)  | O(1)-Zn(1)-O(1W)  | 106.44(10) |
| O(9)-Zn(1)-N(2)   | 105.88(11) |                   |            |

**Table S4.** Selected Bond Lengths (Å) and Angles (deg) for Compounds **4**.

| Compound <b>4</b> |            |                  |            |
|-------------------|------------|------------------|------------|
| Cu(1)-O(1)        | 2.0279(19) | Cu(1)-O(4)       | 2.0712(16) |
| Cu(1)-O(1W)       | 2.0804(16) | Cu(1)-N(4)       | 2.107(2)   |
| Cu(1)-N(2)        | 2.1165(19) | Cu(1)-N(3)       | 2.1324(19) |
| O(1)-Cu(1)-O(4)   | 88.32(7)   | O(1)-Cu(1)-O(1W) | 93.91(7)   |
| O(4)-Cu(1)-O(1W)  | 92.89(7)   | O(1)-Cu(1)-N(4)  | 174.12(7)  |
| O(4)-Cu(1)-N(4)   | 86.76(7)   | O(1W)-Cu(1)-N(4) | 89.55(7)   |
| O(1)-Cu(1)-N(2)   | 85.86(8)   | O(4)-Cu(1)-N(2)  | 88.13(7)   |
| O(1W)-Cu(1)-N(2)  | 178.95(7)  | N(4)-Cu(1)-N(2)  | 90.76(8)   |
| O(1)-Cu(1)-N(3)   | 86.41(7)   | O(4)-Cu(1)-N(3)  | 174.53(8)  |
| O(1W)-Cu(1)-N(3)  | 88.93(7)   | N(4)-Cu(1)-N(3)  | 98.42(8)   |
| N(2)-Cu(1)-N(3)   | 90.03(8)   |                  |            |

**Figure S1.** Powder X-ray Diffraction Patterns of Compounds **1-4**.
